# Supplementary material for: First principles calculations on the hydrogen atom passivation of TiO2 nanotubes
Source: Royal Society of Chemistry journal article supplement (doi:10.1039/c6ra00235h), 2016-01-01

## Supporting information

First principles calculations on the hydrogen atom passivation of TiO<sub>2</sub> nanotube

Jianhong Dai and Yan Song\*

*School of Materials Science and Engineering, Harbin Institute of Technology at Weihai, 2 West*

*Wenhua Road, Weihai 264209, China*

Fig. S1 The distributions of CAD difference of charged TiO<sub>2</sub> nanotubes. (a) (9, 0) and (b) (0, 6).

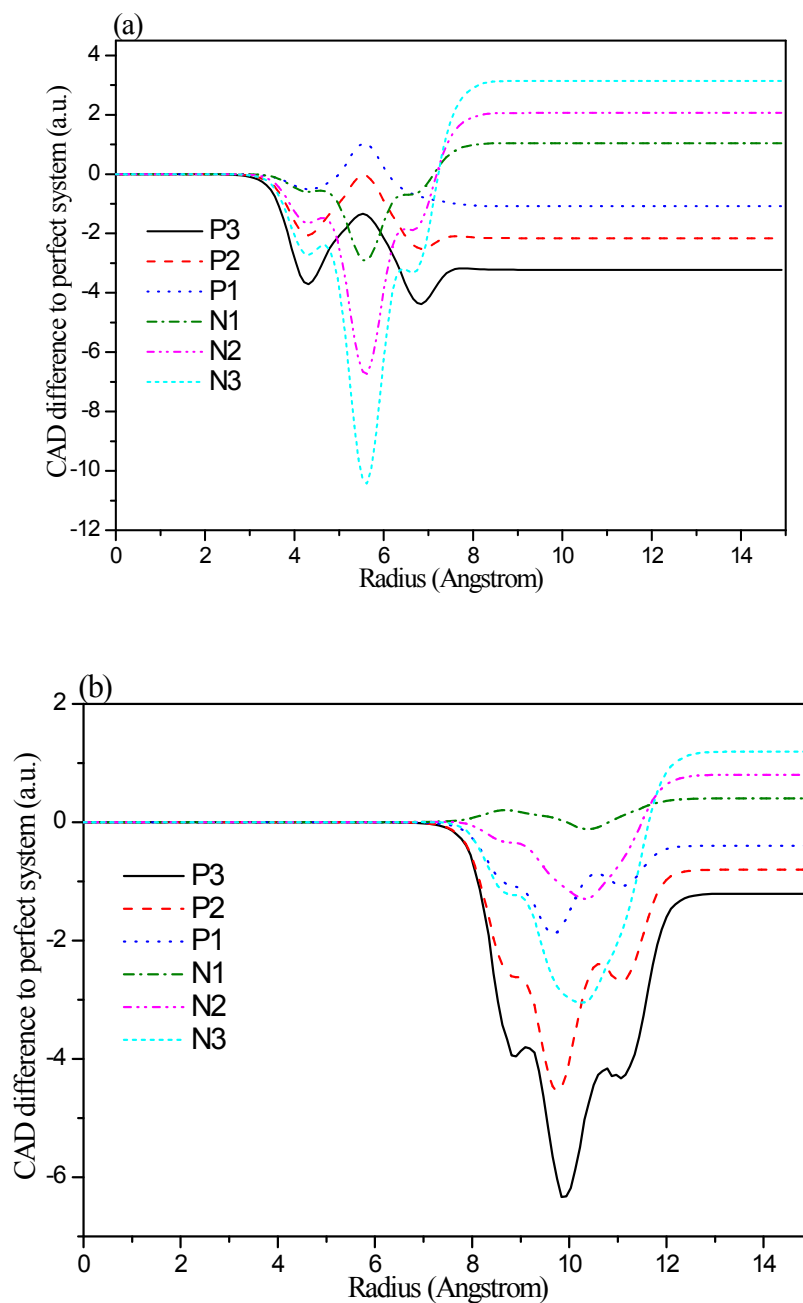

\* Corresponding author's email address: sy@hitwh.edu.cn

Fig. S2 The charge difference distributions of charged TiO<sub>2</sub> nanotubes. (a) (9, 0) and (b) (0, 6).

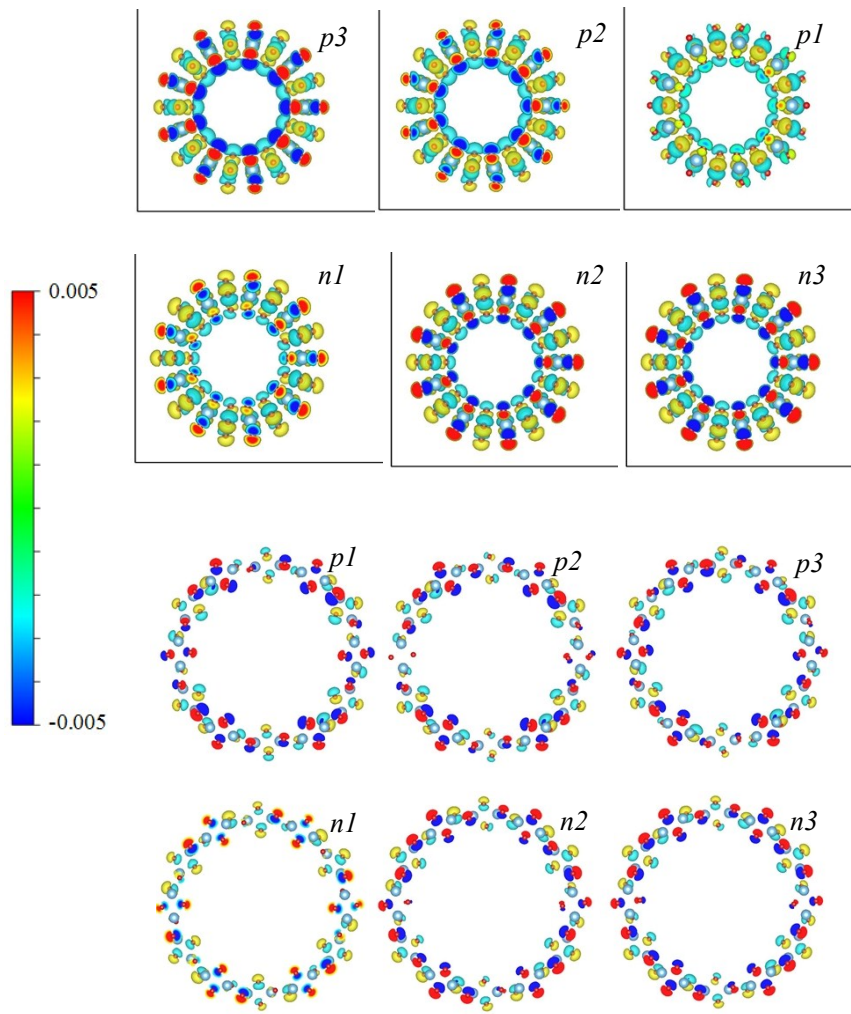

Fig. S3 The density of states of charged (9, 0) TiO<sub>2</sub> nanotube, (a) total density of states, (b) and (c) are the partial density of states of O and Ti atom in the (9, 0) TiO<sub>2</sub> nanotube, respectively.

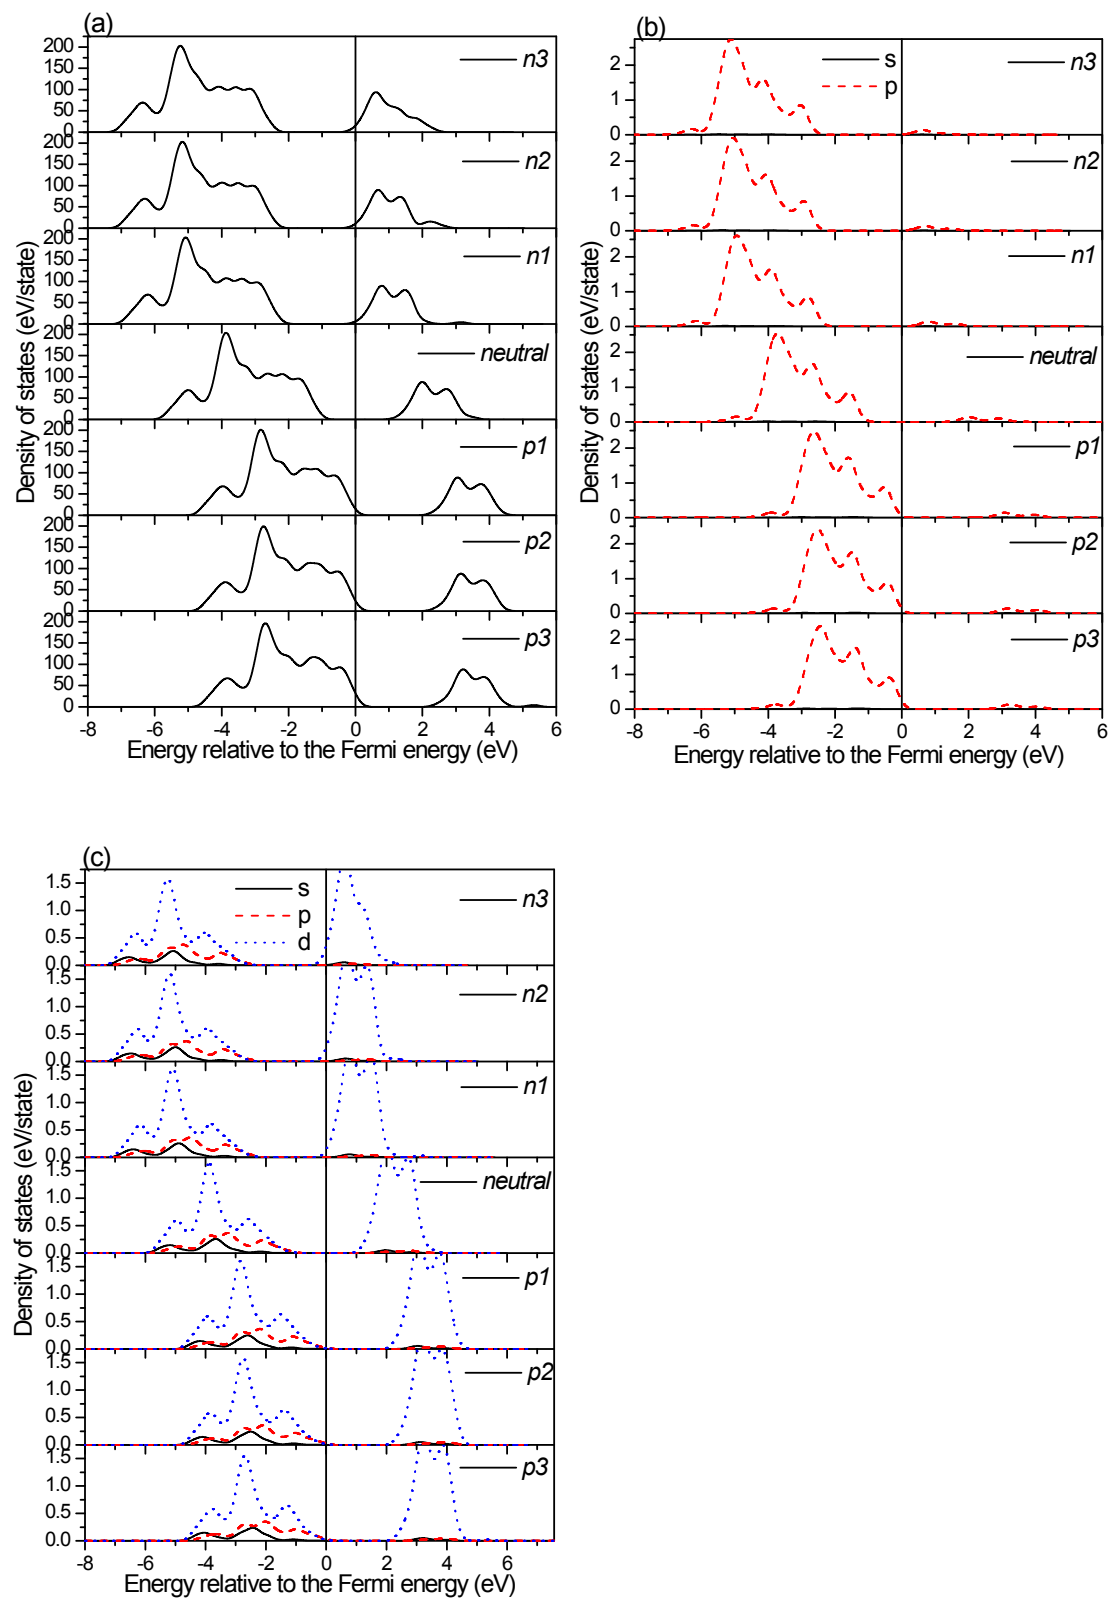

Fig. S4 The density of states of charged (0, 6) TiO<sub>2</sub> nanotube, (a) total density of states, (b) and (c) is the partial density of states of O, and Ti atom in the (0, 6) TiO<sub>2</sub> nanotube, respectively.

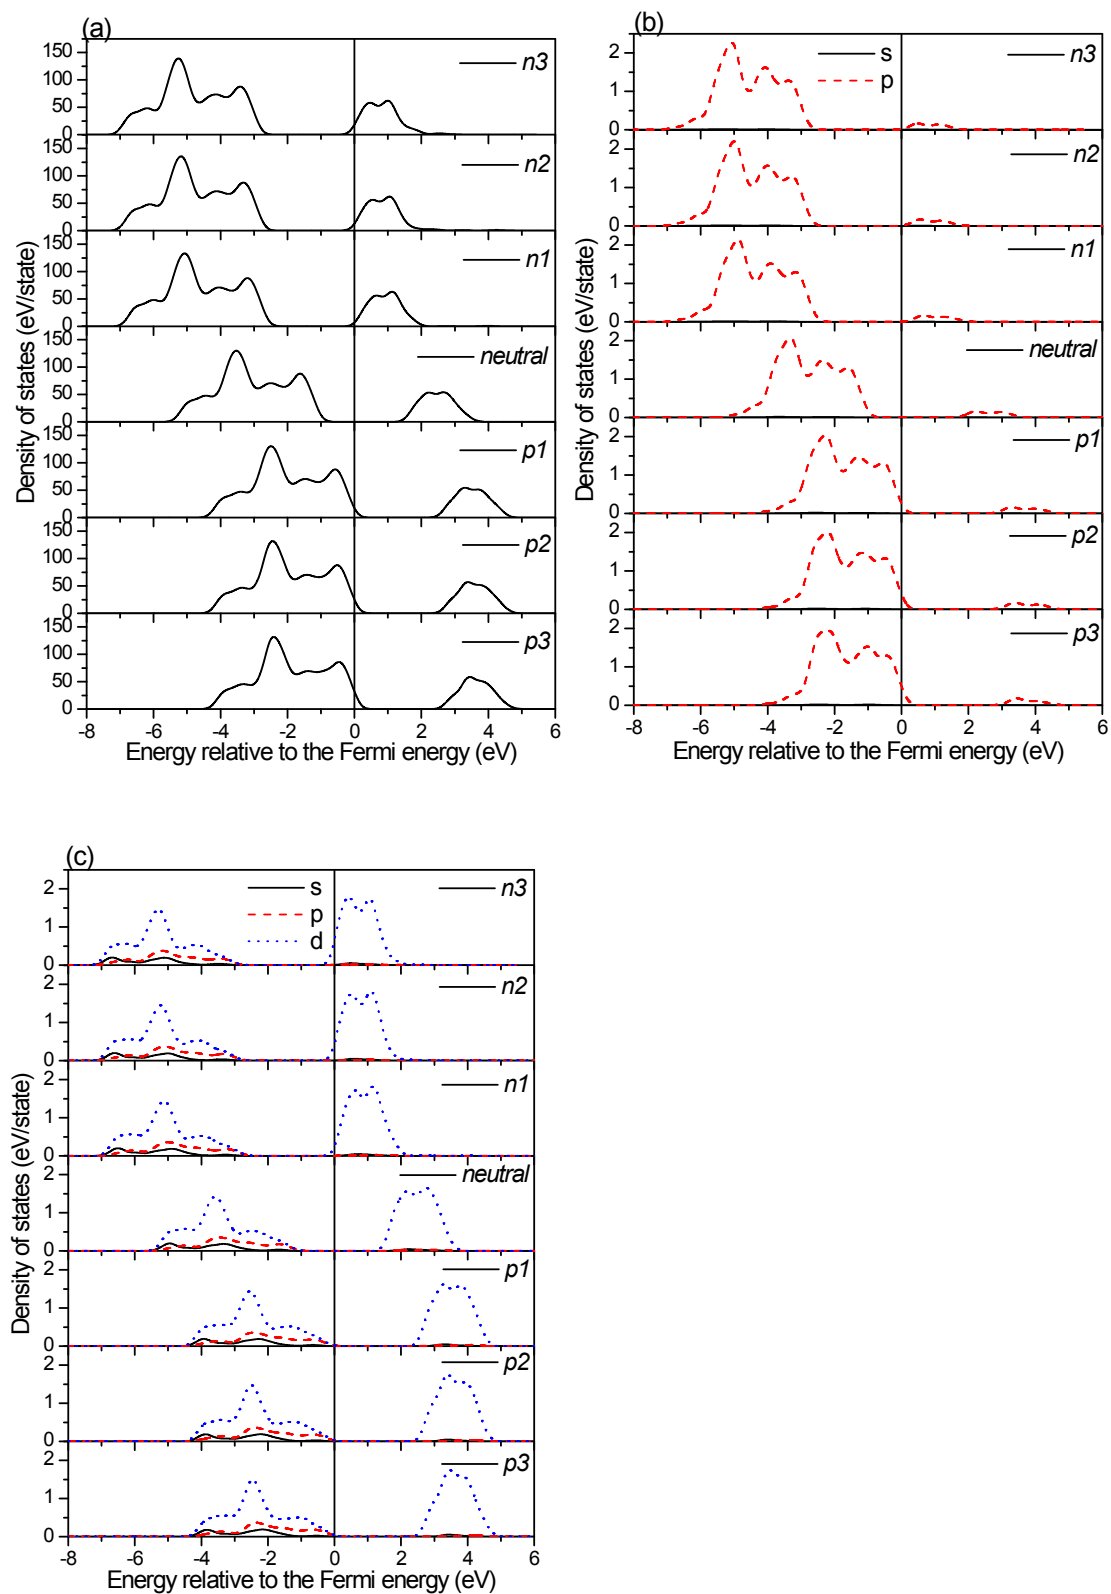

Fig. S5 The distributions of ELF of charged TiO<sub>2</sub> nanotubes.

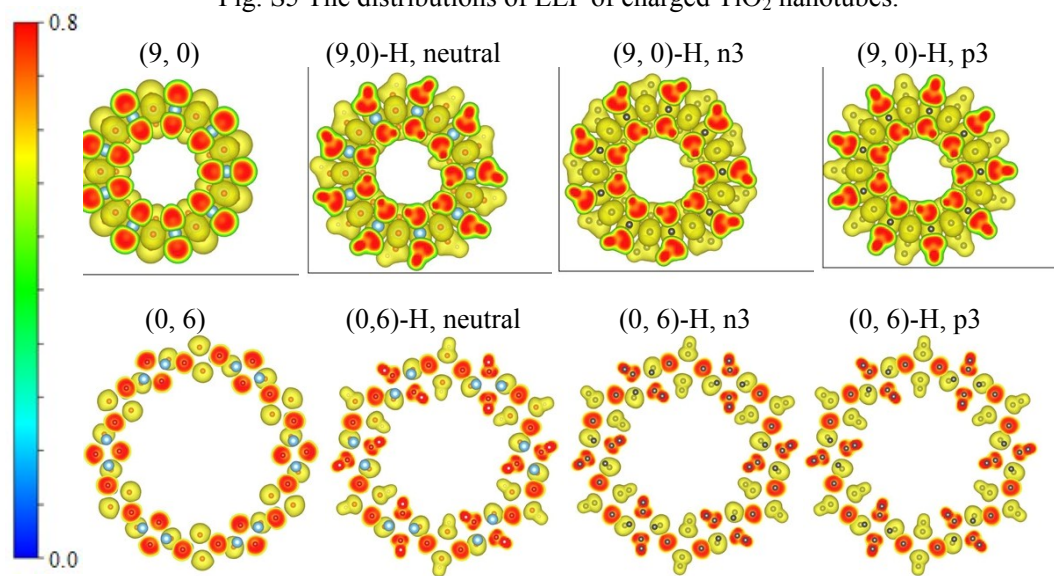

Supplement: c6ra00235h1.pdf [file c6ra00235h1.pdf]
